# Supplementary material for: C50Cl10, a planar aromatic fullerene. Computational study of 13C-NMR chemical shift anisotropy patterns and aromatic properties
Source: Royal Society of Chemistry journal article supplement (doi:10.1039/c8cp04938f), 2018-01-01
Supplement: c8cp04938f1.pdf [file c8cp04938f1.pdf]

Supporting Information for:

## **$C_{50}Cl_{10}$ , A Planar Aromatic Fullerene. Computational Study of $^{13}C$ -NMR Chemical Shift Anisotropy Patterns and Aromatic properties**

Alan Miralrio, Luis E. Sansores, Bruce King, Alvaro Muñoz-Castro\*

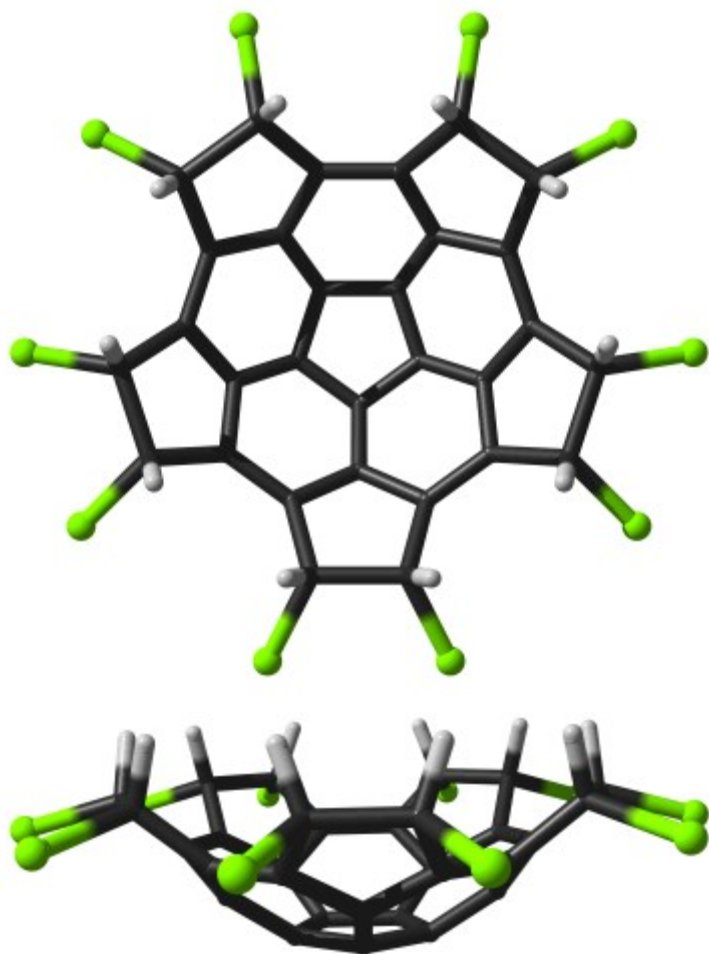

Figure S1. Two views of the chematic representation for  $C_{30}Cl_{10}H_{10}$  in its more favored conformation.
